# Supplementary material for: Lacticaseibacillus casei Strain Shirota Modulates Macrophage-Intestinal Epithelial Cell Co-Culture Barrier Integrity, Bacterial Sensing and Inflammatory Cytokines
Source: MDPI journal article supplement (doi:10.3390/microorganisms10102087), 2022-10-21
Supplement: s1 [file s1]

## Supplementary Section:

Supplementary Table S1. Supporting evidence for PMA- and VD3-differentiated THP-1 derived M1/M2 macrophage subset cell model corresponding to IFN- $\gamma$ /LPS and IL-4/IL-13-differentiated THP-1 and primary cell studies.

| Supporting evidence for THP-1 cell model |                                                                                                                                                                                                               |                                                                                                                                                                                                                       |
|------------------------------------------|---------------------------------------------------------------------------------------------------------------------------------------------------------------------------------------------------------------|-----------------------------------------------------------------------------------------------------------------------------------------------------------------------------------------------------------------------|
|                                          | PMA/M1 Subset                                                                                                                                                                                                 | VD3/M2 Subset                                                                                                                                                                                                         |
| Gene Expression                          | Arginase <sup>neg/lo</sup><br>CD206 <sup>neg/lo</sup><br><br>IL-8 <sup>hi</sup><br>IL-10 <sup>lo</sup><br>IL-12p40 <sup>hi</sup><br>iNOS <sup>hi</sup><br>TNF- $\alpha$ <sup>hi</sup>                         | Arginase <sup>hi</sup><br>CD206 <sup>hi</sup><br>DC-SIGN <sup>hi</sup><br>IL-8 <sup>lo</sup><br>IL-10 <sup>hi</sup><br><br>iNOS <sup>neg/lo</sup><br>TNF- $\alpha$ <sup>lo</sup>                                      |
| Functional Responses to LPS stimulation  | IL-10 <sup>lo</sup><br>IL-12 <sup>hi</sup><br>Phagocytosis <sup>lo</sup><br>Superoxide <sup>hi</sup><br>TNF- $\alpha$ <sup>hi</sup><br>IL-1 $\beta$ <sup>hi</sup><br>IL-6 <sup>hi</sup><br>IL-8 <sup>hi</sup> | IL-10 <sup>hi/med</sup><br>IL-12 <sup>neg/lo</sup><br>Phagocytosis <sup>hi</sup><br>Superoxide <sup>lo</sup><br>TNF- $\alpha$ <sup>lo</sup><br>IL-1 $\beta$ <sup>lo</sup><br>IL-6 <sup>lo</sup><br>IL-8 <sup>lo</sup> |
| Surface Markers                          | CCR1 <sup>+</sup><br>CCR2 <sup>lo</sup><br>CD206 <sup>lo</sup><br>TLR4 <sup>hi</sup>                                                                                                                          | CD206 <sup>hi</sup>                                                                                                                                                                                                   |
| Proteomic Profiling                      | CCL20 isoform 2<br>ICAM-1<br>IL-1 $\beta$<br>SOD isoform 4<br>TLR2<br>TNF- $\alpha$ induced protein 8                                                                                                         | CD68<br>C-type mannose receptor 2<br>TGF- $\beta$ <sub>1</sub><br>Integrin $\alpha$ M<br>Macrophage capping protein,<br>Myeloid cell nuclear<br>differentiation antigen                                               |
| Reproduced Observations                  | THP-1 + IFN $\gamma$ /LPS treatment                                                                                                                                                                           | THP-1 + IL-4 treatment                                                                                                                                                                                                |
